# Supplementary material for: Enhanced Cr(vi) removal by hierarchical CoFe2O4@SiO2–NH2via reduction and adsorption processes
Source: Royal Society of Chemistry journal article supplement (doi:10.1039/d2nj02313j), 2022-01-01
Supplement: d2nj02313j1.pdf [file d2nj02313j1.pdf]

## Supporting Information

### Enhanced Cr (VI) removal by hierarchical $\text{CoFe}_2\text{O}_4@\text{SiO}_2\text{-NH}_2$ via reduction and electrostatic adsorption effect

Dongqin Zhou,<sup>a</sup> Jie Wang,<sup>a</sup> Hao Chen,<sup>a</sup> Xiao Ge,<sup>a\*</sup> Xiaozhi Wang<sup>a,b,c\*</sup>

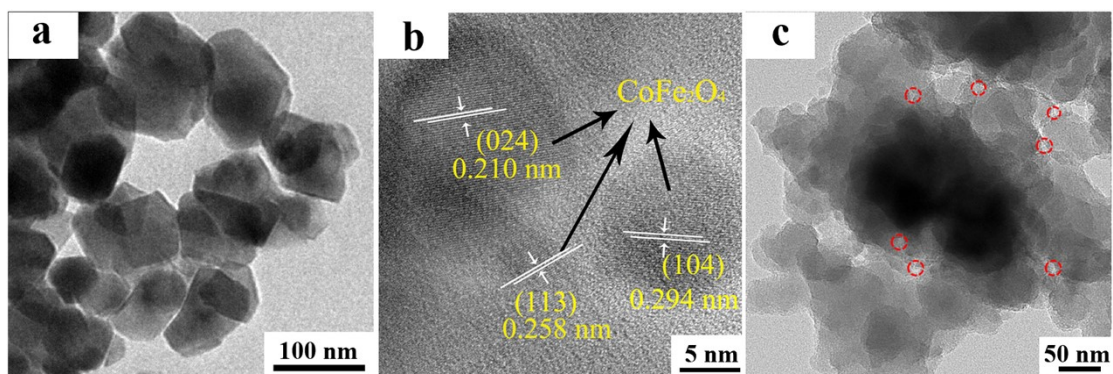

Fig. S1. a, HRTEM of  $\text{CoFe}_2\text{O}_4$ ; b and c, HRTEM of  $\text{CoFe}_2\text{O}_4@\text{SiO}_2\text{-NH}_2$ .

<sup>a</sup> College of Environmental Science and Engineering, Yangzhou University, Yangzhou, 225000, P. R. China

<sup>b</sup> Jiangsu Collaborative Innovation Center for Solid Organic Waste Resource Utilization, Nanjing, 210095, P. R. China

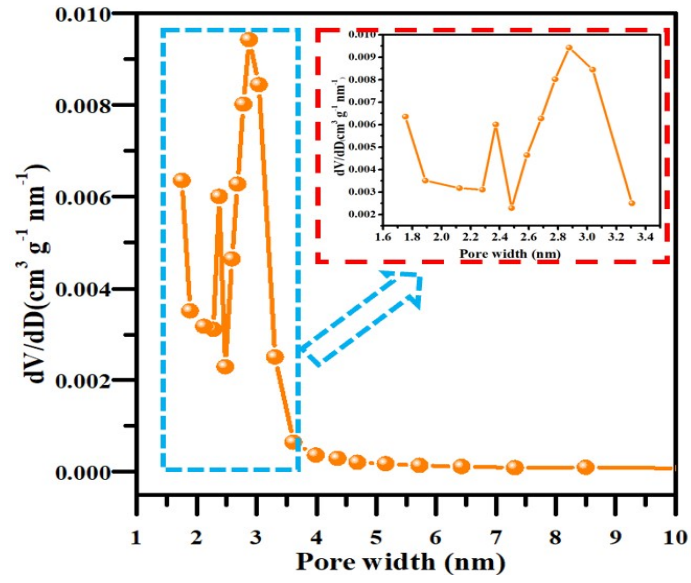

Fig. S2. Pore size distribution of  $\text{CoFe}_2\text{O}_4@\text{SiO}_2\text{-NH}_2$  adsorbent.

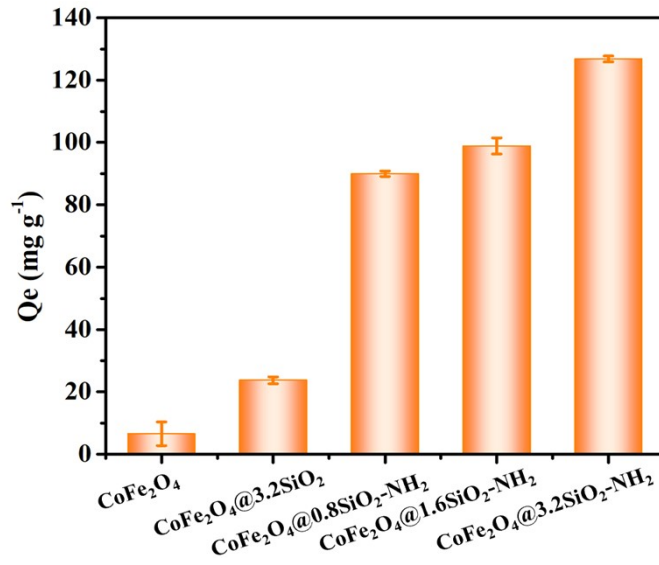

Fig. S3. Comparison in adsorption capacity of adsorbents with different TEOS contents.

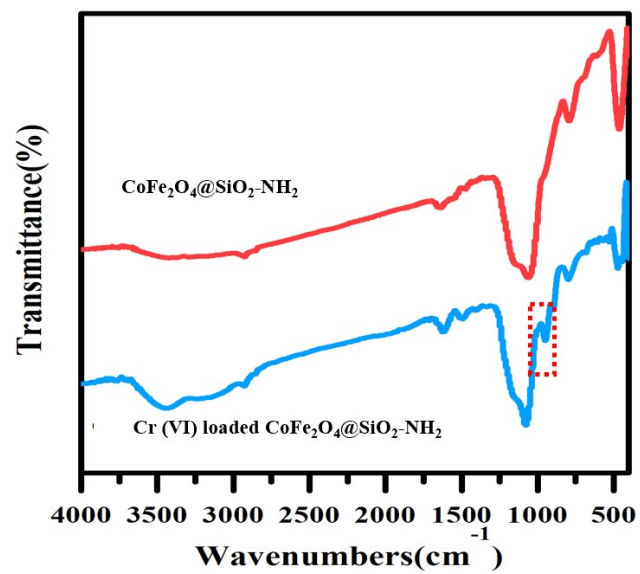

Fig. S4. FT-IR spectrum of adsorbents before and after Cr (VI) adsorption

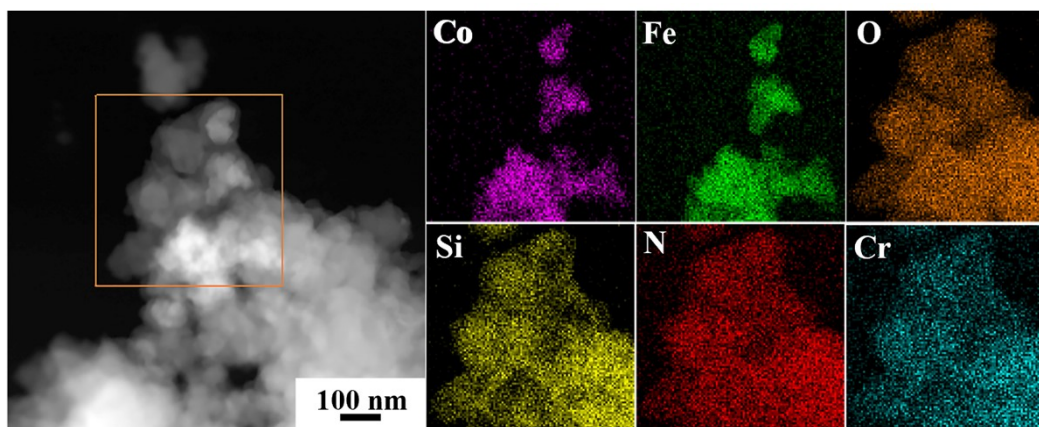

Fig. S5. the EDS mapping of Cr (VI) loaded  $\text{CoFe}_2\text{O}_4@\text{SiO}_2\text{-NH}_2$ .

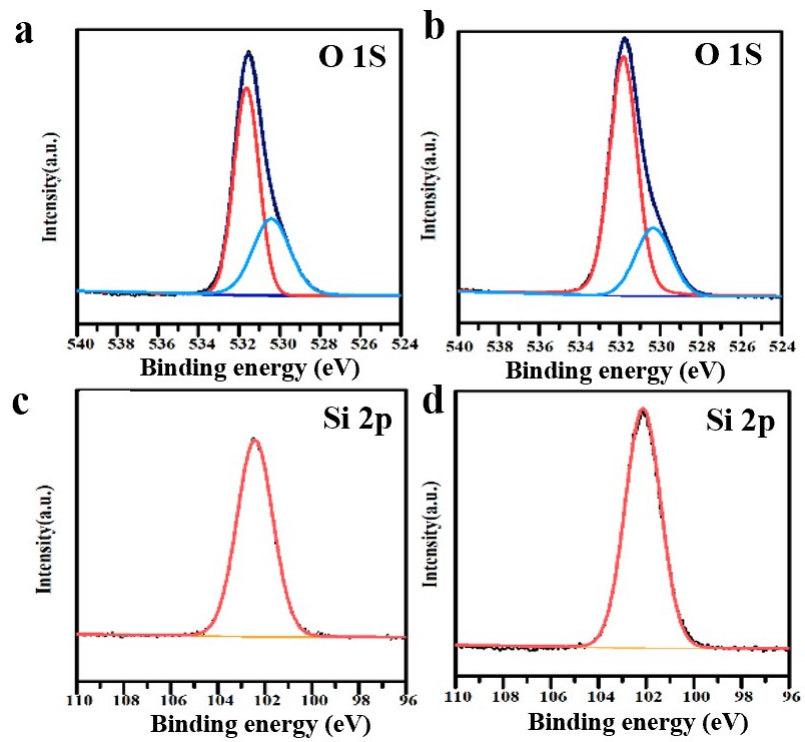

**Fig. S6.** a and b, O 1s before and after Cr (VI) adsorption; c, c and d, Si 2p before and after Cr (VI) adsorption.
